1 **Analysis of biosynthesis and composition of cuticular wax in wild type bilberry (*Vaccinium***  
2 ***myrtillus* L.) and its glossy mutant**

3

4 Priyanka Trivedi<sup>a\*</sup>, Nga Nguyen<sup>a\*</sup>, Linards Klavins<sup>b</sup>, Jorens Kviesis<sup>b</sup>, Esa Heinonen<sup>c</sup>, Janne Remes<sup>c</sup>,  
5 Soile Jokipii-Lukkari<sup>a</sup>, Maris Klavins<sup>b</sup>, Katja Karppinen<sup>d,e</sup>, Laura Jaakola<sup>d,e</sup>, Hely Häggman<sup>a</sup>

6

7

8 <sup>a</sup> Department of Ecology and Genetics, University of Oulu, FI-90014 Oulu, Finland

9 <sup>b</sup> Department of Environmental Science, University of Latvia, LV-1004 Riga, Latvia

10 <sup>c</sup> Centre for Material Analysis, University of Oulu, FI-90014 Oulu, Finland

11 <sup>d</sup> Climate laboratory Holt, Department of Arctic and Marine Biology, UiT The Arctic University of  
12 Norway, NO-9037 Tromsø, Norway

13 <sup>e</sup> NIBIO, Norwegian Institute of Bioeconomy Research, NO-1431 Ås, Norway

14 **\*equal contribution**

15 Priyanka Trivedi: priyanka.priyanka@oulu.fi

16 Nga Nguyen: thi.nguyen@oulu.fi

17 Linards Klavins: linards.klavins@lu.lv

18 Jorens Kviesis: jorens.kviesis@lu.lv

19 Esa Heinonen: esa.heinonen@oulu.fi

20 Janne Remes: janne.remes@oulu.fi

21 Soile Jokipii-Lukkari: soile.jokipii-lukkari@oulu.fi

22 Maris Klavins: maris.klavins@lu.lv

23 Katja Karppinen: katja.karppinen@uit.no

24 Laura Jaakola: laura.jaakola@uit.no

25 Hely Häggman: hely.haggman@oulu.fi

26 Authors for correspondence:

27 Hely Häggman; Tel no: +3580408446842, Priyanka Trivedi; Tel no: +358449775168

28

29 **Number of tables: 2**

30 **Number of figures: 4 (Fig 1, color online and in print)**

31 **Supplementary data: Table S1, S2, S3, Fig S1**

32

33 **Word count: 5327**

34 **Running title: Biosynthesis of bilberry cuticular wax**

35 **Highlight**

36 Chemical composition and morphology of cuticular wax along with gene expression for wax  
37 biosynthetic genes varied between glossy type mutant (GT) and wild type (WT) fruit.

38

39

40

41

42

43

44

45

46 **Abstract**

47 Cuticular wax plays an important role in fruits in protection against environmental stresses and  
48 desiccation. In this study, biosynthesis and chemical composition of cuticular wax in wild type (WT)  
49 bilberry fruit was studied during development and compared with its natural glossy type (GT) mutant.  
50 The cuticular wax load in GT fruit was comparable to WT fruit. In both fruits, triterpenoids were the  
51 dominant wax compounds with decreasing proportion during the fruit development accompanied with  
52 increasing proportion of aliphatic compounds. Gene expression studies supported the pattern of  
53 compound accumulation during fruit development. Genes *CER26-like*, *FAR2*, *CER3-like*, *LTP*, *MIXTA*,  
54 and *BAS* exhibited prevalent expression in fruit skin indicating role in cuticular wax biosynthesis and  
55 secretion. In GT fruit, higher proportion of triterpenoids in cuticular wax was accompanied by lower  
56 proportion of fatty acids and ketones compared to WT fruit as well as lower density of crystalloid  
57 structures on berry surface. Our results suggest that a marked reduction in ketones in cuticular wax may  
58 play a significant role in the formation of glossy phenotype leading to the loss of rod-like structures in  
59 epicuticular wax layer of GT fruit.

60

61 **Keywords:** berry development, bilberry, fruit cuticle, gene expression, glossy type mutant,  
62 triterpenoids, wax composition.

63

64

65

66

67

68

69

70

71

72 **Abbreviations**

|    |        |                                |
|----|--------|--------------------------------|
| 73 | BAS    | $\beta$ -amyrin synthase       |
| 74 | KAS    | $\beta$ -ketoacyl-ACP synthase |
| 75 | KCS    | $\beta$ -ketoacyl-CoA-synthase |
| 76 | FAR    | Fatty acyl-CoA reductase       |
| 77 | GT     | Glossy type mutant             |
| 78 | LTP    | Lipid transfer protein         |
| 79 | LUS    | Lupeol synthase                |
| 80 | MAH1   | Mid-chain alkane hydrolase     |
| 81 | DGAT   | Diacylglycerol acyltransferase |
| 82 | OSCs   | Oxidosqualene cyclase enzymes  |
| 83 | SEM    | Scanning electron microscopy   |
| 84 | VLCFAs | Very long chain fatty acids    |
| 85 | WSD1   | Wax synthase                   |
| 86 | WT     | Wild type                      |

87

88

89

90

91

92

## 93 **Introduction**

94 Cuticle is a lipophilic layer on aerial parts of plant surface, composed of cuticular wax and cutin, a  
95 polyester polymer matrix. Cuticle plays an important role in preventing water loss, protection against  
96 UV radiation and pathogen attack in plants, including fruits at different developmental stages and  
97 during storage period (Lara *et al.*, 2014; Petit *et al.*, 2017). Cuticular wax is a complex mixture of very  
98 long chain fatty acids (VLCFAs) and their derivatives, such as aldehydes, alkanes, ketones, primary  
99 and secondary alcohols, esters as well as secondary metabolites, including triterpenoids, sterols, and  
100 phenolic compounds (Kunst and Samuels, 2009; Lara *et al.*, 2015). Fruit cuticular waxes have  
101 especially been shown as good sources of triterpenoids, which are well known for their health  
102 beneficial properties, including antioxidant and anti-inflammatory properties as well as decreasing risk  
103 for cardiovascular diseases (Szakiel *et al.*, 2012; Han and Bakovic, 2015). Previous studies have shown  
104 that the composition of cuticular wax varies not only between species, cultivars and organs, but also  
105 with the developmental stage of the same organ (van Maarseveen *et al.*, 2009). A variable trend in wax  
106 deposition rate as well as alterations in chemical composition of cuticular wax through fruit  
107 development in various species have been reported (Curry, 2005; Domínguez *et al.*, 2008; Wang *et al.*,  
108 2016; Trivedi *et al.*, 2019b).

109 Cuticular wax can be seen as whitish (glaucous) or glossy epicuticular wax, while it is also embedded  
110 on the cutin as intracuticular wax (Jenks *et al.*, 2002; Ensikat *et al.*, 2006). The chemical basis for the  
111 difference between glaucous and glossy wax phenotypes is unclear although has been studied in  
112 various species. Glaucous leaf and stem mutants of *Arabidopsis* showed higher wax load accompanied  
113 by higher density of epicuticular wax crystals (Jenks *et al.* 1996). Characterization of naturally  
114 occurring glaucous lines have identified  $\beta$ -diketones to be responsible for glaucousness in wheat and  
115 barley (Hen-Avivi *et al.*, 2016). Among fruits, orange glossy type mutant fruits showed a decrease in  
116 wax load accompanied by reduction in proportion of aldehydes affecting crystalloid formation (Liu *et*  
117 *al.*, 2012; 2015). In cucumber, *CsCER1*-RNAi transgenic lines showing glossy phenotype  
118 demonstrated inhibited wax crystallization attributed to decrease in proportion of alkanes as compared  
119 to wild type lines (Wang *et al.*, 2015b). In case of apples, glossiness (or greasiness) was attributed to  
120 melting of wax crystalloids and formation of amorphous wax (Yang *et al.*, 2017). There is a need of  
121 more fruit specific studies to understand the chemical and morphological basis of glossy and glaucous  
122 phenotypes.

123 The wax biosynthesis pathways with key genes have been elucidated by studies performed especially in  
124 Arabidopsis. In general, the biosynthesis of aliphatic compounds of cuticular wax starts from *de novo*  
125 fatty acid biosynthesis in plastids producing C<sub>16</sub>–C<sub>18</sub> fatty acids by  $\beta$ -ketoacyl-ACP synthase (KAS) as  
126 key enzyme (Fig. S1). The later stages of biosynthesis occur in endoplasmic reticulum (ER) exclusively  
127 in epidermal cells where elongation of VLCFAs (C<sub>20</sub>–C<sub>34</sub>) is facilitated by  $\beta$ -ketoacyl-CoA-synthase  
128 (KCS). The different classes of aliphatic compounds of the cuticular wax are modified from the  
129 VLCFAs by two pathways; acyl reduction pathway (alcohol forming) to produce primary alcohols and  
130 wax esters, and decarbonylation pathway (alkane forming) to produce aldehydes, alkanes, ketones, and  
131 secondary alcohols. The primary alcohols are biosynthesized by fatty acyl-CoA reductase (FAR)  
132 encoded by *CER4* (Rowland *et al.*, 2006), and then further esterified to wax esters by wax synthase  
133 enzyme (WSD1/DGAT). *CER1* and *CER3*, encoding aldehyde decarbonylase and VLC-acyl-CoA  
134 reductase, respectively, have been identified to be involved in alkane synthesis (Rowland *et al.*, 2007;  
135 Bernard *et al.*, 2012). Secondary alcohols are produced from alkanes by mid-chain alkane hydrolase  
136 (MAH1). The wax components are transported to Golgi (McFarlane *et al.*, 2014) and exported through  
137 the plasma membrane by heterodimer ABCG transporter family proteins, known as ABC11/WBC11  
138 and ABC12/CER5 in Arabidopsis (Bird *et al.*, 2007). The wax compounds are transported and secreted  
139 to the cell wall by non-specific lipid transfer protein (LTP; Kunst and Samuels, 2009). However, the  
140 mechanism of wax secretion is not yet fully understood. The wax triterpenoids are biosynthesized from  
141 squalene and cyclized by oxidosqualene cyclase enzymes (OSCs) such as  $\beta$ -amyrin synthase (BAS)  
142 and lupeol synthase (LUS), to produce variety triterpenoids and steroids (Fig. S1; Delis *et al.*, 2011).

143 There are only few studies of wax biosynthesis in fruits and the studies have mostly focused on  
144 horticultural plants, such as tomato (*Solanum lycopersicum* L., Mintz-Oron *et al.*, 2008), sweet cherry  
145 (*Prunus avium* L., Alkio *et al.*, 2012), apple (*Malus domestica* L., Albert *et al.*, 2013), orange (*Citrus*  
146 *sinensis* L., Liu *et al.*, 2015; Wang *et al.*, 2016), mango (*Mangifera indica* L., Tafolla-Arellano *et al.*,  
147 2017), and cucumber (*Cucumis sativus* L., Wang *et al.*, 2015a,b; Wang *et al.*, 2018). Bilberries  
148 (*Vaccinium myrtillus* L.) are deciduous shrubs with wide distribution in cool temperate regions and  
149 mountain areas of Europe and Asia. As an abundant resource in Northern forest, wild bilberries play a  
150 significant role in food industry. The berries provide also an excellent raw material for extraction of  
151 health beneficial products, like anthocyanins, but the leftovers of food industry (berry press cakes) can  
152 also be utilized for extraction of bioactive wax compounds (Lara *et al.*, 2014; Trivedi *et al.*, 2019a).

153 The goal of this study was to explore wild type bilberry fruit (WT) and glossy type natural mutant (GT)  
154 for differences in composition, morphology and biosynthesis of cuticular wax through developmental  
155 stages. We studied overall wax amounts, proportion of wax compound classes and absolute wax  
156 amounts (in  $\mu\text{g}/\text{cm}^2$ ) in WT and GT through developmental stages. To put compositional data into  
157 context, we identified genes related to cuticular wax from *de novo* bilberry transcriptome constructed  
158 earlier (Nguyen *et al.*, 2018) and used as an exploratory data to understand the wax biosynthesis in  
159 bilberry.

## 160 **Materials and methods**

### 161 **Plant materials**

162 Wild type (WT) and glossy type mutant (GT) fruits of bilberry (*Vaccinium myrtillus* L.) at four  
163 developmental stages, named S2 (small green fruits), S3 (large green fruits), S4 (ripening red fruits),  
164 and S5 (fully ripe blue fruits), as described previously (Nguyen *et al.*, 2018), were utilized for studies  
165 (Fig. 1). The fruits were collected using forceps during June to August 2018 from the natural forest  
166 stand in Oulu, Finland (65°03'37.0"N 25°28'30.4"E).

### 167 **Scanning electron microscopy (SEM)**

168 For SEM analysis, fresh berries were dried immediately after collection by using a vacuum freeze-drier  
169 (Edwards High Vacuum International, West Sussex, England) before fixed on aluminium stubs. The  
170 berry surfaces were sputter-coated with 20 nm layer of platinum by using a sputter coater (Agar High  
171 Resolution Sputter Coater, Agar Scientific Ltd, Essex, UK) and then investigated for the three-  
172 dimensional surface micromorphology by using SEM (Helios Nanolab 600, Oregon, USA).

### 173 **Cuticular wax extraction and determination of wax amount**

174 Immediately after collection, the cuticular wax from the four developmental stages of both WT and GT  
175 fruits was separately extracted with chloroform (Sigma-Aldrich, St. Louis, USA). Berries were dipped  
176 in 15 mL chloroform for 1 min. The extract was evaporated to dryness under nitrogen flow at room  
177 temperature followed by the measurement of dry weight. The cuticular wax extraction was performed  
178 in triplicates for each berry developmental stage (except glossy type mutant S4 stage, where due to  
179 unavailability of glossy type mutants, extraction was performed in duplicates). The amount of wax was  
180 expressed as weight per unit surface area ( $\mu\text{g}/\text{cm}^2$ ). For calculating the surface areas, images of the

181 dipped berries on a white surface were taken immediately after wax extraction. Image J software v1.50i  
182 (NIH, Maryland, USA) was used to calculate the total surface area of the berries as  $S = 4 \pi r^2$ , where r is  
183 the radius of berry (assuming that the berries are spherical).

#### 184 **GC-MS analysis**

185 Derivatization of fatty acids and GC-MS analysis was performed as described previously by Trivedi *et*  
186 *al.* (2019a). GC-MS analysis was performed using a PerkinElmer Clarus 580 system equipped with a  
187 Clarus SQ 8 C mass-selective detector (Waltham, MA, USA) and an Omegawax 250 column (30 m ×  
188 0.25 mm, 0.25 μm, Darmstadt, Germany). Analysis of FAME's and polyfunctional compounds as  
189 trimethylsilyl derivatives was performed on an Elite-5MS column (30 m × 0.25 mm, 0.25 μm,  
190 PerkinElmer). Identification of compounds was done using NIST MS 2.2 library (Gaithersburg, MD,  
191 USA). The analysis was performed in triplicate.

#### 192 **Identification of candidate genes related to the wax biosynthesis**

193 *De novo* transcriptome database of bilberry (Nguyen *et al.*, 2018), was utilized for identifying candidate  
194 genes related to wax biosynthetic pathway. The identity of the genes were verified by BLASTX with  
195 threshold E-value cut off of 1e-5 against reference protein sequences of Arabidopsis (The Arabidopsis  
196 Information Resource - TAIR, <https://www.arabidopsis.org/>) and other fruits (National Centre for  
197 Biotechnology Information - NCBI).

#### 198 **RNA extraction and qRT-PCR**

199 Skin and pulp were separated from the four developmental stages of both WT and GT fruits by using a  
200 razor blade. After sectioning, the pulp and skin samples were immediately frozen in liquid nitrogen and  
201 stored at -80 °C until used for RNA extraction. For RNA extraction, tissues were ground to fine powder  
202 under liquid nitrogen. Total RNA was extracted with three biological replicates following the protocol  
203 of Jaakola *et al.* (2001). The quantity and quality of RNA samples were tested by Nanodrop (Thermo  
204 Scientific) and 1% agarose gel stained with ethidium bromide. Then, cDNA was synthesized from 5 μg  
205 of total RNA using Superscript III Reverse Transcriptase (Invitrogen, Carlsbad, CA, USA) according to  
206 the manufacturer's instructions. The cDNA was purified from genomic DNA as described by Jaakola *et*  
207 *al.* (2004).

208 The qRT-PCR analysis was performed with LightCycler 480 instrument and software v1.5.0.39 (Roche  
209 Applied Sciences, Foster, CA, USA). The transcript abundance was detected by using LightCycler®



210 SYBR Green I Master qPCR kit (Roche). The qRT-PCR conditions were 95 °C for 10 min followed  
211 by 45 cycles of 95 °C for 10 s, 60 °C for 10 s and 72 °C for 20 s. The qRT-PCR results were  
212 calculated by LightCycler® 480 software (Roche), using the calibrator-normalized PCR efficiency-  
213 corrected method (Technical note no. LC 13/2001, Roche). Glyceraldehyde-3-phosphate  
214 dehydrogenase gene (*GAPDH*, GenBank accession number AY123769) was used as internal control to  
215 normalize the relative transcript levels. The expression of *GAPDH* has been shown to be stable during  
216 the bilberry fruit development (Jaakola *et al.*, 2002). Gene-specific primer sequences used for qRT-  
217 PCR analysis are listed in Table S1.

## 218 **Statistical analysis**

219 Significant differences in various compound classes between WT and GT fruit at p-value < 5% were  
220 analyzed by independent sample *t*-test using SPSS Statistic program v26. The relative means of  
221 expression of the studied genes in WT and GT fruit were compared with either *t*-test or Mann-Whitney  
222 U test using R v3.6.2 (R Core Team, 2019).

## 223 **Results**

### 224 **Cuticular wax morphology**

225 By visual inspection of fruit surface, the difference in appearance between glaucous WT and GT  
226 bilberry can be detected already in early stage (S2) of fruit development (Fig. 1). SEM analysis of fruit  
227 surface during WT fruit development showed a dense cover of irregular platelets at S2 stage (Fig. 1A).  
228 At S3, S4 and S5 stages of WT fruit development, a syntopism of dense rod-like structures with  
229 irregular platelets was seen. In the GT fruit, an amorphous layer of wax with markedly lower density of  
230 crystalloid structures compared to WT bilberry fruit was detected throughout the fruit development  
231 (Fig. 1B). Only membranous platelets but no rod-like structures were detected in GT fruit.

### 232 **Cuticular wax load**

233 Both WT and GT bilberry fruit had cuticular wax present already in S2 stage (Fig. 2). The amount of  
234 wax per berry was found to gradually increase during fruit development of both WT and GT fruit  
235 reaching in ripe stage (S5) the amount of 367.6 µg in WT fruit and 315.5 µg in GT fruit (Fig. 2A). No  
236 marked differences in the total wax amount between the WT and GT fruits in any developmental stage  
237 was detected. Wax amount per surface area increased slightly in both WT and GT fruit at ripening

238 stage (S4) while slight decrease towards S3 and S5 stages was detected (Fig. 2B). The measured  
239 surface areas of GT fruits at S4 and S5 stages were slightly smaller than WT berries explaining the  
240 somewhat higher wax amount per berry in WT berries in S4 and S5 stages that could not be seen when  
241 wax amount was expressed per surface area.

### 242 **Composition of cuticular wax**

243 GC-MS analysis showed that the cuticular wax of both WT and GT fruit were mainly composed of  
244 triterpenoids, fatty acids, primary alcohols, ketones, aldehydes, and alkanes (Fig. 3). Triterpenoids  
245 followed by fatty acids were found to be the dominant compounds in all studied developmental stages  
246 of both WT and GT fruit cuticular wax. Secondary alcohols and esters were not detected in cuticular  
247 wax of either WT or GT fruit.

### 248 **Triterpenoids**

249 The proportion of triterpenoids in cuticular wax showed differences through the course of bilberry fruit  
250 development as it was found to decrease from S2 to S5 (from 72.1% to 51.2%) in WT fruit (Fig. 3).  
251 Also in GT fruit cuticular wax, the proportion of triterpenoids was found to decrease during fruit  
252 development from S2 to S5 (from 84.5% to 65.0%). The triterpenoid proportion was higher in cuticular  
253 wax of GT fruit compared to WT fruit at all the studied stages of bilberry fruit development (Fig. 3).  
254 Relative triterpenoid proportion was found to be higher in GT fruit by 17% in S2, 29% in S3, 29% in  
255 S4 and 18% in S5 compared to WT fruits.

256 Generally, oleanoic acid was the predominant triterpenoid in cuticular wax of both WT and GT fruit  
257 during development (Table 1). Ursolic acid,  $\beta$ -amyrin, and  $\alpha$ -amyrin were also found in all stages of  
258 WT and GT fruit cuticular wax. Lupeol was detected only in S3, S4 and S5 stage in both WT and GT  
259 berries. Levels of amyrins and lupeol were found to be highest in S4 stage. Esters of oleanane and  
260 ursane type triterpenoids were found specifically in S4 and S5 stage. Oleanoic acid was found in higher  
261 amounts in GT than WT fruit in S3, S4 and S5 stages.  $\beta$ -amyrin was present in higher amount in S2, S3  
262 and S4 stage in GT than in WT fruits (Table 1).

### 263 **Aliphatic compounds**

264 Generally, in both WT and GT fruits, the proportion of total aliphatic compounds increased during fruit  
265 development (Fig 3). A markedly lower proportion of total aliphatic compounds was observed in GT

266 fruit relative to WT fruit in every developmental stage. This was mainly contributed by lower  
267 percentage of fatty acids in GT fruit compared to WT fruit (Fig 3). The proportion of fatty acids  
268 increased during both WT and GT fruit development. Montanic acid (C28) was the dominant fatty acid  
269 in both WT and GT fruits during S4 and S5 stages (Table 2).

270 The proportion of ketones showed significant decrease in cuticular wax of GT fruit compared to WT  
271 fruit (Fig 3). The relative proportion decreased by 8 fold (S2), 19 fold (S3), 6 fold (S4) and 22 fold (S5)  
272 in GT than WT fruit. The proportion of ketones decreased slightly during WT fruit development. 2-  
273 heneicosanone (C21) was the dominant ketone found in both WT and GT fruit in all developmental  
274 stages but the amount was significantly higher in WT compared to GT fruit (Table 2).

275 Aldehydes were detected in high proportions only in S4 and S5 stages in both WT and GT fruit  
276 cuticular wax (Fig 3). Higher relative proportions of aldehydes were detected in GT compared to WT  
277 fruit by 53% in S4 and by 50% in S5 stage of fruit ripening. Octacosanal was the dominant aldehyde in  
278 both WT and GT fruits, followed by hexacosanal and triacontanal (Table 2).

279 Primary alcohols and alkanes showed a variable trend during development in both WT and GT fruits  
280 (Fig 3). A lower relative proportion of primary alcohols in GT relative to WT was observed with a  
281 decrease in S2 by 18% and S3 by 63%, followed by an increase in 11% in S4 and 74% in S5. Aromatic  
282 acids (phenolic acids) were found only in S2 and S3 developmental stages in both WT and GT fruit  
283 (Table 2).

#### 284 **Identification and expression of cuticular wax biosynthetic genes**

285 In the published bilberry transcriptome database (Nguyen *et al.*, 2018), we were able to identify 335  
286 unigenes encoding enzymes predicted to be involved in wax biosynthetic pathway, including fatty acid  
287 synthesis, fatty acid elongation, wax compound biosynthesis, wax transportation, and regulation of wax  
288 biosynthesis (Table S2). In the triterpenoid biosynthetic pathway, we identified 21 unigenes encoding  
289 two OSCs, namely BAS and LUS (Table S2). Sixteen unigenes were selected for gene expression  
290 analysis based on high sequence similarity with Arabidopsis and some fruit bearing species (Table S3).

291 The qRT-PCR results in pulp and skin of WT and GT fruits during development are shown in Fig. 4.  
292 Overall, the genes showed differential expression patterns during bilberry fruit development. Notably,  
293 the *CER26-like*, *FAR2*, *CER3-like*, *LTP*, *MIXTA*, and *BAS* genes were expressed at higher levels in the  
294 skin of both WT and GT fruits (Fig. 4).

295 In fatty acid biosynthetic pathway, bilberry unigene encoding *KAS* showed highest expression in pulp  
296 of both WT and GT fruits at developmental stage S3. In fatty acid elongation stage, *KCS4* transcript  
297 level was upregulated at the onset of ripening (S4) in both WT and GT fruits. Another elongation gene,  
298 *CER26-like* was predominantly expressed in the berry skin in both WT and GT fruits. Considering the  
299 differences in the gene expression of wax related genes in WT and GT bilberry fruit, we observed that  
300 the expression level of *CER26-like* was high at early stages in GT fruits in contrast to WT fruits which  
301 showed upregulation at the onset of ripening at S4 stage

302 In the alcohol-forming pathway, we identified a unigene annotated as *FAR3-like* in bilberry which was  
303 not found to be differentially expressed through all ripening stages between pulp and skin. However,  
304 *FAR2* exhibited skin-specific expression. The expression of *FAR2* gene was highest at development  
305 stages S2 and S3 and dramatically dropped thereafter in both WT and GT fruits. *FAR2* exhibited higher  
306 transcript abundance in GT than WT fruits. Two candidate genes encoding *WSD1/DGAT* showed no  
307 difference between pulp and skin in most of the developmental stages.

308 In the alkane-forming pathway, *CER3-like* was markedly up-regulated at the onset of ripening (S4) in  
309 both WT and GT fruits. In contrast, *CER1* did not differ in transcript levels in pulp and skin of WT and  
310 GT in the developmental stages except S4. *MAH1*, which has been related with the formation of the  
311 secondary alcohols, did not show differential expression between berry pulp and skin in developmental  
312 stages except S4.

313 In the triterpenoid biosynthetic pathway, *BAS* exhibited skin-specific expression in both WT and GT  
314 fruit. The expression pattern of *BAS* was high at early development stage S2, and was then gradually  
315 down-regulated throughout the ripening in GT fruit. The expression of *BAS* was also down-regulated at  
316 the fully ripe stage S5 in WT fruit. *LUS* gene showed higher expression in pulp with high expression at  
317 development stage S3.

318 Among the genes involved in the transportation of wax components, two *ABCG* genes, *ABCG11* and  
319 *ABCG15-like* were expressed higher levels in skin compared to pulp especially at ripening stages S4  
320 and S5. *ABCG11* and *ABCG15-like* genes were down-regulated at the onset of ripening stage in GT  
321 skin and pulp compared to WT. Expression of *LTP* was found peaking at early development stage S2.  
322 The expression level of *LTP* gene was slightly higher in GT than WT bilberry. From the bilberry  
323 transcriptome database, we identified a unigene encoding *MIXTA*, a MYB transcription factor related

324 to regulation of cuticle formation, which was up-regulated at early developmental stages S2 and S3.  
325 *MIXTA* showed slightly higher expression level in WT than GT fruits in skin.

## 326 **Discussion**

### 327 **WT and GT bilberry fruits both show accumulation of cuticular wax**

328 Glossy, black bilberry mutant fruits have generally been considered to be waxless (Colak *et al.*, 2017)  
329 although no scientific studies concerning the analysis of cuticular wax load has been reported  
330 previously. In orange, glaucous fruits have been demonstrated to contain higher cuticular wax load (Liu  
331 *et al.*, 2012). However, in the present study, we found that both WT and GT bilberry fruits showed high  
332 and comparable accumulation of cuticular wax. Our results support the view that visual phenotype of  
333 plant cuticle is not correlated with the wax load (Adamski *et al.*, 2013).

334 Based on our results, changes in wax biosynthesis and accumulation takes place during bilberry fruit  
335 development. Wax amount per berry increased during the fruit development of both WT and GT fruits  
336 indicating constant wax biosynthesis. Wax load per surface area remained somewhat constant due to  
337 growth of berry size although there were slight changes that can be attributed to the changes in the  
338 surface area compared to wax deposition rate. In other fruits, variable trends in wax load during fruit  
339 development have been reported (Trivedi *et al.*, 2019b). Increase in wax load throughout the fruit  
340 development has also been reported in blueberry (Chu *et al.*, 2018), apple (Ju and Bramlage, 2001),  
341 pear (Li *et al.*, 2014) and orange fruits (Liu *et al.*, 2012) whereas in grape, wax load increases until  
342 veraison followed by decrease in final ripening stage (Pensec *et al.*, 2014).

### 343 **Glossy phenotype is attributed to changes in chemical composition affecting wax morphology**

344 It has been previously reported that mutations in wax biosynthesis causing glossy surface in  
345 *Arabidopsis* leaf and stem show reduced density of wax crystals and sometimes also alterations in the  
346 crystal shape and size (Jenks *et al.*, 1996). Similar results has been obtained in studies on surfaces of  
347 glossy fruits of orange (Liu *et al.*, 2012; 2015) and cucumber (Wang *et al.*, 2015a,b). Our study also  
348 demonstrated a decrease in the density of epicuticular wax crystal structures in GT fruit compared to  
349 WT fruit. While a dense cover of platelets along with rod-like structures were detected in S3, S4 and S5  
350 stages in WT fruit, the surface of GT fruit was devoid of rod-like structures and dominated by  
351 membranous platelets. Our data suggest that the difference in appearance between WT and GT fruit of

352 bilberry is based on the difference in epicuticular wax morphology that is due to differential chemical  
353 composition between WT and GT fruit.

354 Previously, Markstädter *et al.* (2000) correlated the glaucous phenotype stems of *Macaranga* species to  
355 higher triterpenoid content. In contrast, our study showed higher proportion of triterpenoids in glossy  
356 fruits compared to glaucous WT fruits. Since triterpenoids generally occur in intracuticular layer of  
357 wax (Jetter and Schaffer, 2001), they may not have a significant role in epicuticular wax crystal  
358 formation. Instead, epicuticular wax crystalloids are known to be dominated by aliphatic compounds.  
359 Previous studies have also attributed glaucousness to the presence of  $\beta$ -diketones in wheat flag leaf  
360 sheath (Zhang *et al.*, 2013), however, in our study  $\beta$ -diketones were not found. Instead, among aliphatic  
361 compounds we observed the most prominent difference between WT and GT fruits in proportion of  
362 ketones. The result implies that glossy appearance in GT bilberry fruits could be due to the high  
363 reduction in amount of ketones. In supporting this hypothesis, our previous study showed that glaucous  
364 appearing bilberry (rod-like epicuticular morphology) and bog bilberry (coiled rodlet morphology)  
365 contain ketones while glossy appearing lingonberry and crowberry are devoid of ketones as well as  
366 rod-like structures (Trivedi *et al.*, 2019a). Ketones have earlier been reported to be responsible for the  
367 formation of transversely rigid rodlets (Meusel *et al.*, 1999). Also, cuticular waxes including ketones  
368 have been reported to form different types of rodlets in different plant species (Ensikat *et al.*, 2006).

### 369 **Chemical composition of cuticular wax changes during bilberry fruit development**

370 The chemical composition of ripe WT bilberry fruit cuticular wax corroborates with our previous study  
371 (Trivedi *et al.*, 2019a). However, the wax composition showed changes during the course of bilberry  
372 fruit development with the proportion of major compound classes generally varying similarly in both  
373 WT and GT fruits. A decrease in the proportion of triterpenoids and an increase in proportion of total  
374 aliphatic compounds was detected during bilberry fruit development. The decrease in the proportion of  
375 triterpenoids during fruit development has also been reported in grape (Pensec *et al.*, 2014) and sweet  
376 cherry (Peschel *et al.*, 2007). In accordance to our study, a recent study in bilberry reported lowest  
377 percentage of triterpenoids in cuticular wax of young fruits with increase during fruit development  
378 (Dashbaldan *et al.*, 2019). However, in blueberry fruits the proportion of triterpenoids increased  
379 through developmental stages (Chu *et al.*, 2018) indicating differences in wax biosynthesis even  
380 between closely related species. During bilberry fruit development, the presence of aldehydes during  
381 the later stages of berry development (S4 and S5) indicates that these are the key stages for

382 biosynthesis of aldehydes in bilberry fruit cuticular wax. In wax biosynthetic pathway (Fig. S1),  
383 secondary alcohols are precursors for ketones, however, secondary alcohols were not observed in  
384 bilberry cuticular wax. The formation of ketones without the formation of secondary alcohols remains  
385 elusive. This might suggest that secondary alcohols are converted directly to ketones in bilberry or that  
386 ketones are biosynthesized via a different pathway in bilberry compared to Arabidopsis but needs  
387 further studies.

### 388 **Role of wax biosynthetic genes in bilberry fruit cuticular wax formation**

389 The genes proposed to be involved in wax biosynthesis in bilberry showed differential expression  
390 profiles through the course of fruit development with markedly different expression of some genes in  
391 skin compared to pulp indicating their attendance in wax biosynthesis into cuticle.

392 Our results demonstrated uniform gene expression of *KAS* gene in the studied bilberry fruit tissues  
393 (skin and pulp) attributed to the broad role of *KAS* in synthesis of *de novo* fatty acid precursors, which  
394 can be partitioned to various pathways, such as suberin and cutin (Samuels *et al.*, 2008). *KAS*  
395 expression profile is in line with our observation that the fatty acids proportion increases through the  
396 course of development gradually. The highest amounts of fatty acid precursors detected in S3 stage is  
397 most likely followed by further distribution of precursors to different wax biosynthesis pathways. The  
398 high upregulation in *KAS* gene expression at S3 in pulp in both WT and GT berries may indicate high  
399 fatty acid biosynthesis in bilberry seeds for synthesis of seed oils at S3 stage. It has been shown that  
400 bilberry seed oil has high content of PUFAs (C18) and vitamin E (Yang *et al.*, 2011; Gustinelli *et al.*,  
401 2018).

402 For the fatty acid elongation, 21 *KCS* genes have been identified in Arabidopsis of which several genes  
403 were proposed to have roles in determining specific chain length of VLCFAs in different organs  
404 (Tresch *et al.*, 2012). The transcript level of unigene for bilberry *KCS4* was up-regulated at the onset of  
405 ripening (S4) in WT and GT fruits whereas bilberry *CER26-like* gene had highest expression already at  
406 S3 stage in GT fruit. *CER26-like* gene has been characterized for the elongation of specific chain length  
407 longer than C<sub>28</sub> in leaves and stem of Arabidopsis (Pascal *et al.*, 2013). The skin-specific expression of  
408 *CER26-like* gene suggests that it may play an important role in biosynthesis of very long chain fatty  
409 acids (VLCFAs) and its derivatives in bilberry. The differential expression of *CER26-like* genes  
410 between WT and GT fruit skin suggests that this gene might be responsible for differential  
411 accumulation of very long chain aliphatic compounds.

412 We observed the skin specific expression of *FAR2* (Fig. 4), a homolog of *AtFAR2* that produces  
413 primary alcohols incorporated into sporopollenin of the pollen exine layer (Chai *et al.*, 2018). This  
414 suggests the role of *FAR2* gene in alcohol forming pathway in bilberry fruit.

415 In Arabidopsis, mutation of *CER3* gene led to a decrease in the amount of aldehydes, alkanes and their  
416 derivatives (Rowland *et al.*, 2007). In bilberry, the accumulation trend of aldehydes in cuticular wax  
417 corroborated with the gene expression trend of *CER3-like* gene, both increasing at late ripening stages.  
418 This is in accordance with the expression pattern of *CER3* during fruit ripening of sweet cherry, mango,  
419 and orange (Alkio *et al.*, 2012; Wang *et al.*, 2016; Tafolla-Arellano *et al.*, 2017). Therefore, we  
420 hypothesize that in bilberry *CER3* gene is involved in biosynthesis of aldehydes.

421 The intracellular transport of wax compounds from ER to plasma membrane is proposed to occur either  
422 by trafficking through Golgi system (McFarlane *et al.*, 2014), or by oil bodies in the cytoplasm (Li *et*  
423 *al.*, 2016). It is well established that ABCG transporters are required for wax transport across the  
424 plasma membrane (McFarlane *et al.*, 2010). Lipid transfer proteins are also responsible for transporting  
425 lipid compounds in the cell wall. In Arabidopsis, *ABCG11* and *ABCG12* have been identified and  
426 characterized for function in wax deposition in stem (McFarlane *et al.*, 2010). In the present study, we  
427 found higher expression of *ABCG15-like* in fruit skin suggesting that this gene may play a role in the  
428 wax transport in bilberry cuticle. Similarly, skin-specific expression of *LTP* gene in bilberry suggests  
429 its role in transportation of wax compounds in the fruit cuticle.

430 In fleshy fruits, some regulatory genes of cuticular wax biosynthesis have been identified and  
431 characterized e.g. *MdSHN3* in apple (Lashbrooke *et al.*, 2015b), tomato *SISHINE3* and *SIMIXTA*, a  
432 MYB regulator downstream to *SISHINE3* (Shi *et al.*, 2013; Lashbrooke *et al.*, 2015a). These positive  
433 regulators have been proposed to affect cuticle formation and epidermal cell differentiation (Oshima *et*  
434 *al.*, 2013; Lashbrooke *et al.*, 2015a). *SIMIXTA* has been shown to be down-regulated during tomato  
435 fruit ripening (Lashbrooke *et al.*, 2015a) similar to the qRT-PCR results of this gene in bilberry fruits.  
436 Therefore, our results suggest that the MIXTA plays a role in the cuticle of bilberry fruits at early  
437 developmental stages.

438 The cuticular wax pathway has been characterized in plants, however the biosynthesis and transport of  
439 triterpenoids in cuticular wax is a topic less explored. We observed skin specific expression of *BAS* in  
440 bilberry fruit skin, similar to two *OSC* genes in tomato, *SITTS1* and *SITTS2*, which were expressed  
441 exclusively in the epidermis and produced triterpenoids for the fruit cuticular wax (Wang *et al.*, 2011).



442 The high expression of *BAS* in early stage of development is in line with the high expression of  
443 triterpenoids generally in early stages of development.

#### 444 **Conclusions**

445 Based on our results, bilberry GT fruits have cuticular wax load comparable to WT bilberry fruit.  
446 However, the chemical composition and morphology of cuticular wax along with gene expression for  
447 wax biosynthetic genes varied between GT fruit and WT fruit. GT fruit had higher content of  
448 triterpenoids accompanied by lower content of fatty acids, ketones compared to WT fruit. Significant  
449 reduction of ketones was accompanied by the loss of rod-like structures in GT fruit cuticular wax  
450 suggest a correlation between glaucousness and ketones in bilberry fruit cuticular wax. The skin  
451 specific expression of *CER26-like*, *FAR2*, *CER3-like*, *LTP*, *MIXTA*- and *BAS* underlines the role of  
452 these genes in wax biosynthesis in bilberry.

#### 453 **Supplementary data**

454 Table S1. Primers used for qRT-PCR analysis.

455 Table S2. Number of unigenes involved in the cuticular wax biosynthesis of bilberry.

456 Table S3. Characterization of wax-related genes in bilberry.

457 Fig. S1. Schematic presentation of cuticular wax biosynthetic pathway. PM: plasma membrane, CW:  
458 cell wall.

#### 459 **Acknowledgments**

460 This work was financially supported by I4 future doctoral program, hosted at the University of Oulu:  
461 Novel Imaging and Characterization Methods in Bio, Medical, and Environmental Research and  
462 Technology Innovations, which is the European Union's Horizon 2020 Research and Innovation  
463 Programme under the Marie Skłodowska-Curie action co-funded by international, interdisciplinary and  
464 inter-sectoral doctoral programme (grant number 713606 to PT). The research was also funded by  
465 InterregNord (Natural Wax of Arctic Berries as Our Treasure – WAX project (number 20201089 to  
466 University of Oulu and grant IR16-020 and grant RMF16-026 to Troms Fylkeskommune and NIBIO).

#### 467 **Competing interests**

468 The authors declare that they have no competing interests.

## References

- Adamski NM, Bush MS, Simmonds J, Turner AS, Mugford SG, Jones A, Findlay K, Pedentchouk N, von Wettstein Knowles P, Uauy C.** 2013. The Inhibitor of wax 1 locus (*I w1*) prevents formation of  $\beta$ - and OH- $\beta$ -diketones in wheat cuticular waxes and maps to a sub-c M interval on chromosome arm 2 BS. *The Plant Journal* **74**, 989-1002.
- Albert Z, Ivanics B, Molnár A, Miskó A, Tóth M, Papp I.** 2013. Candidate genes of cuticle formation show characteristic expression in the fruit skin of apple. *Plant Growth Regulation* **70**, 71-78.
- Alkio M, Jonas U, Sprink T, van Nocker S, Knoche M.** 2012. Identification of putative candidate genes involved in cuticle formation in *Prunus avium* (sweet cherry) fruit. *Annals of Botany* **110**, 101-112.
- Bernard A, Domergue F, Pascal S, Jetter R, Renne C, Faure JD, Haslam RP, Napier JA, Lessire R, Joubès J.** 2012. Reconstitution of plant alkane biosynthesis in yeast demonstrates that Arabidopsis ECERIFERUM1 and ECERIFERUM3 are core components of a very-long-chain alkane synthesis complex. *The Plant Cell* **24**, 3106-3118.
- Bird D, Beisson F, Brigham A, Shin J, Greer S, Jetter R, Kunst L, Wu X, Yephremov A, Samuels L.** 2007. Characterization of Arabidopsis ABCG11/WBC11, an ATP binding cassette (ABC) transporter that is required for cuticular lipid secretion. *The Plant Journal* **52**, 485-498.
- Chai G, Li C, Xu F, Li Y, Shi X, Wang Y, Wang Z.** 2018. Three endoplasmic reticulum-associated fatty acyl-coenzyme a reductases were involved in the production of primary alcohols in hexaploid wheat (*Triticum aestivum* L.). *BMC Plant Biology* **18**, 41.
- Chu W, Gao H, Chen H, Wu W, Fang X.** 2018. Changes in cuticular wax composition of two blueberry cultivars during fruit ripening and postharvest cold storage. *Journal of Agricultural and Food Chemistry* **66**, 2870-2876.
- Colak N, Primetta A K, Riihinen K R, Jaakola L, Grúz J, Strnad, M, Ayaz FA.** 2017. Phenolic compounds and antioxidant capacity in different-colored and nonpigmented berries of bilberry (*Vaccinium myrtillus* L.). *Food Bioscience* **20**, 67–78.
- Curry EA.** 2005. Ultrastructure of epicuticular wax aggregates during fruit development in apple (*Malus domestica* Borkh.). *Journal of Horticultural Science and Biotechnology*. **80**, 668–676.

- Dashbaldan S, Becker R, Paczkowski C, Szakiel, A.** 2019. Various patterns of composition and accumulation of steroids and triterpenoids in cuticular waxes from screened Ericaceae and Caprifoliaceae berries during fruit development. *Molecules*, **24**, 3826
- Delis C, Krokida A, Georgiou S, Pena-Rodriguez LM, Kavroulakis N, Ioannou E, Roussis V, Osbourn AE, Papadopoulou KK.** 2011. Role of lupeol synthase in *Lotus japonicus* nodule formation. *New Phytologist* **189**,335–346.
- Domínguez E, López-Casado G, Cuartero J, Heredia A.** 2008. Development of fruit cuticle in cherry tomato (*Solanum lycopersicum*). *Functional Plant Biology* **35**, 403-411.
- Ensikat HJ, Boese M, Mader W, Barthlott W, Koch K.** 2006. Crystallinity of plant epicuticular waxes: Electron and X-ray diffraction studies. *Chemistry and Physics of Lipids* **144**, 45–59
- Gustinelli G, Eliasson L, Svelander C, Andlid T, Lundin L, Ahrné L, Alminger M.** 2018. Supercritical fluid extraction of berry seeds: Chemical composition and antioxidant activity. *Journal of Food Quality* <https://doi.org/10.1155/2018/6046074>
- Han N, Bakovic M.** 2015. Biologically active triterpenoids and their cardioprotective and anti-inflammatory effects. *Journal of Bioanalysis & Biomedicine* **12 (005)**, 1948-5.
- Hen-Avivi S, Savin O, Racovita RC, et al.** 2016. A metabolic gene cluster in the Wheat W1 and the Barley Cer-cqu loci determines  $\beta$ -Diketone biosynthesis and glaucousness. *The Plant Cell* **28**, 1440-1460
- Jaakola L, Määttä K, Pirttilä AM, Törrönen R, Kärenlampi S, Hohtola A.** 2002. Expression of genes involved in anthocyanin biosynthesis in relation to anthocyanin, proanthocyanidin, and flavonol levels during bilberry fruit development. *Plant Physiology* **130**, 729-739.
- Jaakola L, Pirttilä AM, Halonen M, Hohtola A.** 2001. Isolation of high quality RNA from bilberry (*Vaccinium myrtillus* L.) fruit. *Molecular Biotechnology* **19**, 201-203.
- Jaakola L, Pirttilä AM, Vuosku J, Hohtola A.** 2004. Method based on electrophoresis and gel extraction for obtaining genomic DNA-free cDNA without DNase treatment. *BioTechniques* **37**, 744-748.

- Jetter R, Schaffer S.** 2001. Chemical composition of the *Prunus laurocerasus* leaf surface. Dynamic changes of the epicuticular wax film during leaf development. *Plant Physiology* **126**, 1725–1737
- Jenks MA, Eigenbrode SD, Lemieux B.** 2002. Cuticular waxes of Arabidopsis. The Arabidopsis Book/American Society of Plant Biologists **1**, e0016.
- Jenks MA, Rashotte AM, Tuttle HA, Feldmann KA.** 1996. Mutants in *Arabidopsis thaliana* altered in epicuticular wax and leaf morphology. *Plant Physiology* **110**, 377-385.
- Jetter R, Schaffer S.** 2001. Chemical composition of the *Prunus laurocerasus* leaf surface. Dynamic changes of the epicuticular wax film during leaf development. *Plant Physiology* **126**, 1725–1737
- Ju Z, Bramlage WJ.** 2001. Developmental changes of cuticular constituents and their association with ethylene during fruit ripening in ‘delicious’ apples. *Postharvest Biology and Technology* **21**, 257–263.
- Kunst L, Samuels L.** 2009. Plant cuticles shine: advances in wax biosynthesis and export. *Current Opinion in Plant Biology* **12**, 721-727.
- Lara I, Belge B, Goulao LF.** 2014. The fruit cuticle as a modulator of postharvest quality. *Postharvest Biology and Technology* **87**, 103-112.
- Lara I, Belge B, Goulao LF.** 2015. A focus on the biosynthesis and composition of cuticle in fruits. *Journal of Agricultural and Food Chemistry* **63**, 4005-4019.
- Lashbrooke J, Adato A, Lotan O, et al.** 2015a. The tomato MIXTA-like transcription factor coordinates fruit epidermis conical cell development and cuticular lipid biosynthesis and assembly. *Plant Physiology* **169**, 2553-2571.
- Lashbrooke J, Aharoni A, Costa F.** 2015b. Genome investigation suggests *MdSHN3*, an APETALA2-domain transcription factor gene, to be a positive regulator of apple fruit cuticle formation and an inhibitor of russet development. *Journal of Experimental Botany* **66**, 6579-6589.
- Li N, Xu C, Li-Beisson Y, Philippar K.** 2016. Fatty acid and lipid transport in plant cells. *Trends in Plant Science* **21**, 145-158.
- Li Y, Yin Y, Chen S, Bi Y, Ge Y.** 2014. Chemical composition of cuticular waxes during fruit development of Pinguoli pear and their potential role on early events of *Alternaria alternata* infection. *Functional Plant Biology* **41**, 313–320.

- Liu D, Yang L, Zheng Q, Wang Y, Wang M, Zhuang X, Wu Q, Liu C, Liu S, Liu Y.** 2015. Analysis of cuticular wax constituents and genes that contribute to the formation of ‘glossy Newhall’, a spontaneous bud mutant from the wild-type ‘Newhall’ navel orange. *Plant Molecular Biology* **88**, 573-590.
- Liu DC, Zeng Q, Ji QX, Liu CF, Liu SB, Liu Y.** 2012. A comparison of the ultrastructure and composition of fruits’ cuticular wax from the wild-type ‘Newhall’ navel orange (*Citrus sinensis* [L.] Osbeck cv. Newhall) and its glossy mutant. *Plant Cell Reports* **31**, 2239-2246.
- van Maarseveen C, Han H, Jetter R.** 2009. Development of the cuticular wax during growth of *Kalanchoe daigremontiana* (Hamet et Perr. de la Bathie) leaves. *Plant, Cell & Environment* **32**, 73-81
- Markstädter C, Federle W, Jetter R, Riederer M, Hölldobler B.** 2000. Chemical composition of the slippery epicuticular wax blooms on *Macaranga* (Euphorbiaceae) ant-plants. *Chemoecology* **10**, 33-40.
- McFarlane HE, Shin JJ, Bird DA, Samuels AL.** 2010. Arabidopsis ABCG transporters, which are required for export of diverse cuticular lipids, dimerize in different combinations. *The Plant Cell* **22**, 3066-3075.
- McFarlane HE, Watanabe Y, Yang W, Huang Y, Ohlrogge J, Samuels AL.** 2014. Golgi-and trans-Golgi network-mediated vesicle trafficking is required for wax secretion from epidermal cells. *Plant Physiology* **164**, 1250-1260.
- Meusel I, Neinhuis C, Markstädter C, Barthlott, W.** 1999. Ultrastructure, chemical composition, and recrystallization of epicuticular waxes: Transversely ridged rodlets. *Canadian Journal of Botany* **77**, 706-720
- Mintz-Oron S, Mandel T, Rogachev I, et al.** 2008. Gene expression and metabolism in tomato fruit surface tissues. *Plant Physiology* **147**, 823-851.
- Nguyen N, Suokas M, Karppinen K, Vuosku J, Jaakola L, Häggman H.** 2018. Recognition of candidate transcription factors related to bilberry fruit ripening by de novo transcriptome and qRT-PCR analyses. *Scientific Reports* **8**, p.9943.

- Oshima Y, Shikata M, Koyama T, Ohtsubo N, Mitsuda N, Ohme-Takagi M.** 2013. MIXTA-like transcription factors and WAX INDUCER1/SHINE1 coordinately regulate cuticle development in *Arabidopsis* and *Torenia fournieri*. *The Plant Cell* **25**, 1609-1624.
- Pascal S, Bernard A, Sorel M, Pervent M, Vile D, Haslam RP, Napier JA, Lessire R, Domergue F, Joubès J.** 2013. The *Arabidopsis* cer26 mutant, like the cer2 mutant, is specifically affected in the very long chain fatty acid elongation process. *The Plant Journal* **73**, 733-746.
- Pensec F, Paczkowski C, Grabarczyk M, Woźniak A, Bénard-Gellon M, Bertsch C, Chong J, Szakiel A.** 2014. Changes in the triterpenoid content of cuticular waxes during fruit ripening of eight grape (*Vitis vinifera*) cultivars grown in the Upper Rhine Valley. *Journal of Agricultural and Food Chemistry* **62**, 7998-8007.
- Peschel S, Franke R, Schreiber L, Knoche M.** 2007. Composition of the cuticle of developing sweet cherry fruit. *Phytochemistry* **68**, 1017-1025
- Petit J, Bres C, Mauxion JP, Bakan B, Rothan C.** 2017. Breeding for cuticle-associated traits in crop species: traits, targets, and strategies. *Journal of Experimental Botany* **68**, 5369-5387.
- R Core Team.** 2019. R: A language and environment for statistical computing. R Foundation for Statistical Computing, Vienna, Austria. URL <https://www.R-project.org/>
- Rowland O, Lee R, Franke R, Schreiber L, Kunst L.** 2007. The *CER3* wax biosynthetic gene from *Arabidopsis thaliana* is allelic to *WAX2/YRE/FLP1*. *FEBS letters* **581**, 3538-3544.
- Rowland O, Zheng H, Hepworth SR, Lam P, Jetter R, Kunst L.** 2006. *CER4* encodes an alcohol-forming fatty acyl-coenzyme A reductase involved in cuticular wax production in *Arabidopsis*. *Plant Physiology* **142**, 866-877.
- Samuels L, Kunst L, Jetter R.** 2008. Sealing plant surfaces: Cuticular wax formation by epidermal cells. *Annual Review of Plant Biology* **59**, 683.
- Shi JX, Adato A, Alkan N, et al.** 2013. The tomato SlSHINE3 transcription factor regulates fruit cuticle formation and epidermal patterning. *New Phytologist* **197**, 468-480.
- Szakiel A, Pączkowski C, Pensec F, Bertsch C.** 2012. Fruit cuticular waxes as a source of biologically active triterpenoids. *Phytochemistry Reviews* **11**, 263-284.

- Tafolla-Arellano JC, Zheng Y, Sun H, et al.** 2017. Transcriptome analysis of mango (*Mangifera indica* L.) fruit epidermal peel to identify putative cuticle-associated genes. *Scientific Reports* **7**, 46163.
- Tresch S, Heilmann M, Christiansen N, Looser R, Grossmann K.** 2012. Inhibition of saturated very-long-chain fatty acid biosynthesis by mefluidide and perfluidone, selective inhibitors of 3-ketoacyl-CoA synthases. *Phytochemistry* **76**, 162-171.
- Trivedi P, Karppinen K, Klavins L, et al.** 2019a. Compositional and morphological analyses of wax in northern wild berry species. *Food Chemistry* **295**, 441-448.
- Trivedi P, Nguyen N, Hykkerud AL, Häggman H, Martinussen I, Jaakola L, Karppinen K.** 2019b. Developmental and environmental regulation of cuticular wax biosynthesis in fleshy fruits. *Frontiers in Plant Science* **10**:431.
- Wang J, Sun L, Xie L, et al.** 2016. Regulation of cuticle formation during fruit development and ripening in 'Newhall' navel orange (*Citrus sinensis* Osbeck) revealed by transcriptomic and metabolomic profiling. *Plant Science* **243**, 131-144.
- Wang W, Liu X, Gai X, Ren J, Liu X, Cai Y, Wang Q, Ren H.** 2015a. *Cucumis sativus* L. WAX2 plays a pivotal role in wax biosynthesis, influencing pollen fertility and plant biotic and abiotic stress responses. *Plant and Cell Physiology* **56**, 1339-1354.
- Wang W, Wang S, Li M, Hou L.** 2018. Cloning and expression analysis of *Cucumis sativus* L. CER4 involved in cuticular wax biosynthesis in cucumber. *Biotechnology & Biotechnological Equipment* **32**, 1113-1118
- Wang W, Zhang Y, Xu C, et al.** 2015b. Cucumber *ECERIFERUM1* (*CsCER1*), which influences the cuticle properties and drought tolerance of cucumber, plays a key role in VLC alkanes biosynthesis. *Plant Molecular Biology* **87**, 219–233
- Wang Y, Wang J, Chai G, Li C, Hu Y, Chen X, Wang Z.** 2015. Developmental changes in composition and morphology of cuticular waxes on leaves and spikes of glossy and glaucous wheat (*Triticum aestivum* L.). *PLoS One* **10**, e0141239.
- Wang Z, Guhling O, Yao R, Li F, Yeats TH, Rose JK, Jetter R.** 2011. Two oxidosqualene cyclases responsible for biosynthesis of tomato fruit cuticular triterpenoids. *Plant Physiology* **155**, 540-552.

**Yang B, Ahotupa M, Määttä P, Kallio H.** 2011. Composition and antioxidative activities of supercritical CO<sub>2</sub>-extracted oils from seeds and soft parts of northern berries. *Food Research International* **44**, 2009-2017.

**Yang Y, Zhou B, Zhang J, Wang C, Liu C, Liu Y, Zhu X, Ren X.** 2017. Relationships between cuticular waxes and skin greasiness of apples during storage. *Postharvest Biology and Technology* **131**, 55-67.

**Zhang Z, Wang W, Li W.** 2013. Genetic interactions underlying the biosynthesis and inhibition of  $\beta$ -Diketones in wheat and their impact on glaucousness and cuticle permeability. *PLoS ONE* **8**, e54129.



## List of figures

**Fig. 1.** Changes in epicuticular wax morphology on the surface of (A) wild type (WT) and (B) glossy type mutant (GT) bilberry fruits during development. Red arrows indicate platelet structure, yellow arrows indicate rod-like structure, blue arrows indicate membranous platelet structure. S2, small green fruits; S3, large green fruits; S4, ripening red fruits; S5, fully ripe blue fruits.

**Fig. 2.** A) Amount of cuticular wax per berry fruit during ripening stages in wild type (WT) and glossy type mutant (GT) bilberry fruits

(B) Amount of cuticular wax (in  $\mu\text{g}/\text{cm}^2$ ) in wild type (WT) and glossy type mutant (GT) bilberry fruits.

**Fig. 3.** Proportion of chemical compound classes in wild type (WT) and glossy type mutant (GT) bilberry cuticular wax.

**Fig. 4.** Gene expression of wax related genes in wild type bilberry (WT) and glossy type mutant (GT) were studied both in fruit pulp and skin during fruit development. S2, small green fruits; S3, large green fruits; S4, ripening red fruits; S5, fully ripe blue fruits. Error bars represent standard error of three biological replicates. The asterisks denote statistically significant differences between WT and GT (\*:  $p \leq 0.05$ ; \*\*:  $p \leq 0.01$ ; \*\*\*:  $p \leq 0.001$ ).

Table 1. Quantities ( $\mu\text{g}/\text{cm}^2$ ) of triterpenoids during development of wild type bilberry (WT) and glossy type mutant (GT) fruits.

| Cuticular wax compounds | Quantity ( $\mu\text{g}/\text{cm}^2$ ) in WT bilberry |                  |                  |                   | Quantity ( $\mu\text{g}/\text{cm}^2$ ) in GT bilberry |                  |                  |                   |
|-------------------------|-------------------------------------------------------|------------------|------------------|-------------------|-------------------------------------------------------|------------------|------------------|-------------------|
|                         | S2                                                    | S3               | S4               | S5                | S2                                                    | S3               | S4               | S5                |
| Triterpenoids           |                                                       |                  |                  |                   |                                                       |                  |                  |                   |
| Oleanolic acid          | 24.40 $\pm$ 6.16                                      | 10.76 $\pm$ 1.86 | 11.69 $\pm$ 5.79 | 15.18 $\pm$ 3.13* | 18.55 $\pm$ 4.16                                      | 13.30 $\pm$ 2.44 | 24.99 $\pm$ 7.00 | 29.00 $\pm$ 5.31* |
| Ursolic acid            | 22.47 $\pm$ 7.46*                                     | 4.33 $\pm$ 0.70  | 6.49 $\pm$ 5.70  | 9.57 $\pm$ 1.25   | 5.30 $\pm$ 0.81*                                      | 3.69 $\pm$ 0.58  | 11.67 $\pm$ 1.56 | 8.00 $\pm$ 1.12   |
| $\beta$ -Amyrin         | 2.80 $\pm$ 0.91*                                      | 2.71 $\pm$ 0.91  | 5.19 $\pm$ 2.16  | 7.24 $\pm$ 2.03   | 6.83 $\pm$ 1.45*                                      | 3.34 $\pm$ 1.27  | 10.31 $\pm$ 2.47 | 5.22 $\pm$ 0.16   |
| $\alpha$ -Amyrin        | 2.48 $\pm$ 0.69                                       | 2.16 $\pm$ 0.14  | 4.42 $\pm$ 2.03  | 2.52 $\pm$ 0.29   | 3.25 $\pm$ 0.43                                       | 2.45 $\pm$ 0.22  | 5.94 $\pm$ 1.39  | 2.80 $\pm$ 0.44   |
| Lupeol                  | nd                                                    | 2.16 $\pm$ 0.25  | 4.54 $\pm$ 2.12  | 3.28 $\pm$ 0.66   | nd                                                    | 2.24 $\pm$ 0.05  | 6.50 $\pm$ 0.47  | 3.37 $\pm$ 0.48   |
| 28-Norolean-17-en-3-one | 2.23 $\pm$ 0.73                                       | 2.24 $\pm$ 0.24  | nd               | nd                | 1.06 $\pm$ 1.84                                       | 2.60 $\pm$ 0.25  | nd               | nd                |
| Olean-2,12-dien-28-oate | nd                                                    | nd               | 9.14 $\pm$ 3.25  | 0.22 $\pm$ 0.11   | nd                                                    | nd               | 3.64 $\pm$ 0.12  | nd                |
| Ursa-2,12-dien-28-oate  | nd                                                    | nd               | 13.38 $\pm$ 2.43 | 0.21 $\pm$ 0.36   | nd                                                    | nd               | 6.88 $\pm$ 0.85  | nd                |
| Unidentified            | nd                                                    | nd               | nd               | nd                | 5.51 $\pm$ 0.77                                       | 4.00 $\pm$ 0.84  | 1.16 $\pm$ 0.17  | nd                |

Data is means  $\pm$  SD of three replicates, except GT S4 stage, where data is mean  $\pm$  SD of two replicates

\*indicates statistically significant differences between means ( $p < 0.05$ )

Table 2. Quantities ( $\mu\text{g}/\text{cm}^2$ ) of very long chain aliphatic compounds during development of wild type bilberry (WT) and glossy type mutant (GT) fruits.

| Cuticular wax compounds | Quantity ( $\mu\text{g}/\text{cm}^2$ ) in WT bilberry |              |              |               | Quantity ( $\mu\text{g}/\text{cm}^2$ ) in GT bilberry |              |             |              |
|-------------------------|-------------------------------------------------------|--------------|--------------|---------------|-------------------------------------------------------|--------------|-------------|--------------|
|                         | S2                                                    | S3           | S4           | S5            | S2                                                    | S3           | S4          | S5           |
| <i>Fatty acids</i>      |                                                       |              |              |               |                                                       |              |             |              |
| Oleic acid              | 0.06 ± 0.02                                           | nd           | 0.15 ± 0.02  | 0.06 ± 0.01*  | 0.08 ± 0.01                                           | nd           | 0.15 ± 0.12 | 0.13 ± 0.03* |
| Stearic acid            | 0.39 ± 0.01*                                          | 0.23 ± 0.02* | 0.57 ± 0.08  | 0.28 ± 0.01*  | 0.17 ± 0.01*                                          | 0.12 ± 0.01* | 0.25 ± 0.18 | 0.18 ± 0.03* |
| Nonadecanoic acid       | 0.08 ± 0.02                                           | 0.05 ± 0.04  | nd           | 0.05 ± 0.04   | nd                                                    | nd           | 0.04 ± 0.07 | 0.00         |
| Arachidic acid          | 8.34 ± 0.40*                                          | 4.97 ± 0.87* | 6.40 ± 0.29  | 3.56 ± 0.21*  | 1.07 ± 0.20*                                          | 0.60 ± 0.15* | 1.47 ± 1.25 | 0.84 ± 0.34* |
| Behenic acid            | 0.43 ± 0.01*                                          | 0.18 ± 0.04  | 0.44 ± 0.07  | 0.29 ± 0.04   | 0.27 ± 0.09*                                          | 0.19 ± 0.05  | 0.41 ± 0.37 | 0.36 ± 0.06  |
| Lignoceric acid         | 0.54 ± 0.09                                           | 0.28 ± 0.04  | 0.62 ± 0.11  | 0.45 ± 0.09   | 0.47 ± 0.13                                           | 0.30 ± 0.11  | 0.45 ± 0.34 | 0.40 ± 0.07  |
| Hyenic acid             | 0.11 ± 0.04                                           | 0.09 ± 0.00  | nd           | 0.13 ± 0.01   | 0.11 ± 0.00                                           | 0.08 ± 0.01  | 0.00        | 0.12 ± 0.01  |
| Ceric acid              | 1.60 ± 0.47                                           | 1.50 ± 0.09* | 3.40 ± 0.55  | 5.04 ± 1.30   | 1.10 ± 0.23                                           | 0.99 ± 0.31* | 1.88 ± 1.33 | 3.52 ± 0.68  |
| Carboceric acid         | 0.07 ± 0.02                                           | 0.14 ± 0.07  | nd           | 0.24 ± 0.02*  | 0.08 ± 0.00                                           | 0.12 ± 0.01  | nd          | 0.13 ± 0.01* |
| Montanic acid           | 1.40 ± 0.44                                           | 1.99 ± 0.23* | 14.21 ± 4.04 | 10.37 ± 2.00* | 0.90 ± 0.10*                                          | 0.94 ± 0.01* | 4.05 ± 0.00 | 5.03 ± 0.01* |
| Nonacosanoic acid       | 0.07 ± 0.02                                           | 0.08 ± 0.01  | nd           | 0.12 ± 0.02   | 0.04 ± 0.07                                           | nd           | nd          | 0.14 ± 0.02  |
| Melissic acid           | 0.71 ± 0.26                                           | 0.60 ± 0.10  | 1.64 ± 0.53  | 1.67 ± 0.94   | 0.54 ± 0.13                                           | 0.51 ± 0.26  | 0.57 ± 0.20 | 0.92 ± 0.32  |
| <i>Ketones</i>          |                                                       |              |              |               |                                                       |              |             |              |
| 2-Nonanone              | 0.13 ± 0.01*                                          | 0.05 ± 0.03  | nd           | nd            | 0.01 ± 0.02*                                          | nd           | nd          | nd           |
| 2-Undecanone            | 0.04 ± 0.01                                           | 0.03 ± 0.02  | nd           | nd            | 0.04 ± 0.00                                           | nd           | nd          | nd           |
| 2-Tridecanone           | nd                                                    | nd           | 0.12 ± 0.11  | 0.13 ± 0.07   | nd                                                    | nd           | 0.04        | nd           |
| 2-Nonadecanone          | 0.05 ± 0.01                                           | 0.03 ± 0.00  | nd           | nd            | nd                                                    | nd           | nd          | nd           |
| 2-Heneicosanone         | 1.67 ± 0.20                                           | 0.92 ± 0.24* | 0.97 ± 0.65  | 0.64 ± 0.05*  | 0.08 ± 0.01                                           | 0.05 ± 0.00* | 0.20 ± 0.17 | 0.04 ± 0.01* |
| 2-Docosanone            | nd                                                    | nd           | nd           | nd            | nd                                                    | nd           | nd          | nd           |
| <i>Aldehydes</i>        |                                                       |              |              |               |                                                       |              |             |              |
| Octadecanal             | nd                                                    | nd           | 0.03 ± 0.03  | 0.03 ± 0.00   | nd                                                    | nd           | 0.01 ± 0.01 | 0.02 ± 0.02  |
| Tetracosanal            | nd                                                    | nd           | 0.05 ± 0.04  | 0.04 ± 0.01*  | nd                                                    | nd           | 0.06 ± 0.03 | 0.07 ± 0.02* |
| Pentacosanal            | nd                                                    | nd           | 0.07 ± 0.02  | 0.06 ± 0.02   | nd                                                    | nd           | 0.05 ± 0.04 | 0.08 ± 0.01  |
| Hexacosanal             | 0.04 ± 0.03                                           | 0.02 ± 0.00  | 1.03 ± 0.07  | 1.27 ± 0.48*  | 0.03 ± 0.00                                           | 0.03 ± 0.01  | 1.25 ± 1.13 | 2.72 ± 0.34* |
| Heptacosanal            | nd                                                    | nd           | nd           | 0.16 ± 0.05   | nd                                                    | 0.03 ± 0.00  | nd          | 0.19 ± 0.02  |
| Octacosanal             | 0.02 ± 0.01                                           | nd           | 2.11 ± 0.17  | 3.35 ± 0.72   | nd                                                    | 0.04 ± 0.00  | 2.15 ± 1.82 | 4.65 ± 0.45  |
| Triacontanal            | nd                                                    | nd           | 0.25 ± 0.24  | 0.67 ± 0.24   | nd                                                    | nd           | 0.28 ± 0.11 | 0.55 ± 0.15  |
| <i>Primary alcohols</i> |                                                       |              |              |               |                                                       |              |             |              |
| 1-Hexadecanol           | 0.27 ± 0.09                                           | 0.25 ± 0.07  | 0.07 ± 0.00  | nd            | 0.25 ± 0.22                                           | nd           | nd          | nd           |
| 1-Octadecanol           | 0.28 ± 0.07*                                          | 0.38 ± 0.01* | 0.21 ± 0.00  | 0.29 ± 0.00   | 0.38 ± 0.02*                                          | 0.29 ± 0.03* | nd          | nd           |

|                       |               |             |             |             |              |             |             |             |
|-----------------------|---------------|-------------|-------------|-------------|--------------|-------------|-------------|-------------|
| 2-Octacosen-1-ol      | nd            | nd          | nd          | 0.27 ± 0.02 | nd           | nd          | nd          | 0.38 ± 0.06 |
| 1-Eicosanol           | nd            | nd          | 0.73 ± 0.10 | 0.23 ± 0.04 | nd           | nd          | 0.68 ± 0.06 | 0.33 ± 0.06 |
| 1-Docosanol           | 0.16 ± 0.16   | nd          | 0.74 ± 0.12 | 0.24 ± 0.04 | nd           | nd          | 0.67 ± 0.04 | 0.34 ± 0.06 |
| 1-Tricosanol          | 0.15 ± 0.16   | nd          | nd          | nd          | nd           | nd          | nd          | nd          |
| 1-Tetracosanol        | 0.17 ± 0.16   | nd          | 0.86 ± 0.20 | 0.30 ± 0.04 | nd           | nd          | 0.73 ± 0.05 | 0.40 ± 0.06 |
| 1-Pentacosanol        | 0.05 ± 0.09   | nd          | nd          | 0.27 ±      | nd           | nd          | nd          | 0.42 ± 0.07 |
| 1-Hexacosanol         | 0.05 ± 0.09   | nd          | 0.83 ± 0.07 | 0.44 ± 0.06 | nd           | nd          | 0.90 ± 0.09 | 0.47 ± 0.08 |
| 1-Octacosanol         | nd            | nd          | 0.29 ± 0.50 | nd          | nd           | nd          | 0.82 ± 0.06 | 0.50 ± 0.07 |
| 2-Nonacosen-1-ol      | nd            | nd          | nd          | 0.26 ± 0.02 | nd           | nd          | nd          | 0.38 ± 0.06 |
| <i>Alkanes</i>        |               |             |             |             |              |             |             |             |
| Tetracosane           | nd            | 0.01 ± 0.02 | 0.25 ± 0.01 | 0.20 ± 0.04 | nd           | 0.04 ± 0.00 | 0.23 ± 0.00 | 0.24 ± 0.09 |
| Pentacosane           | 0.13 ± 0.04   | 0.09 ± 0.01 | 0.11 ± 0.01 | 0.04 ± 0.00 | 0.11 ± 0.00  | 0.09 ± 0.00 | 0.10 ± 0.02 | 0.09 ± 0.06 |
| Hexacosane            | 0.04 ± 0.01   | 0.04 ± 0.00 | 0.51 ± 0.07 | 0.33 ± 0.24 | 0.06 ± 0.01  | 0.04 ± 0.00 | 0.41 ± 0.09 | 0.33 ± 0.12 |
| Heptacosane           | 0.29 ± 0.09   | 0.18 ± 0.01 | nd          | 0.03 ± 0.02 | 0.21 ± 0.05  | 0.16 ± 0.04 | nd          | 0.06 ± 0.06 |
| Octacosane            | 0.05 ± 0.01   | nd          | nd          | 0.11 ± 0.10 | nd           | nd          | nd          | 0.09 ± 0.16 |
| Nonacosane            | 0.22 ± 0.03   | 0.13 ± 0.04 | nd          | nd          | 0.18 ± 0.02  | 0.09 ± 0.00 | nd          | 0.06 ± 0.05 |
| Hentriacontane        | 0.09 ± 0.02   | 0.05 ± 0.02 | nd          | nd          | 0.08 ± 0.01  | 0.07 ± 0.02 | nd          | 0.09 ± 0.04 |
| Total                 | 0.81          | 0.50        | 0.87        | 0.71        | 0.63         | 0.48        | 0.73        | 0.96        |
| <i>Phenolic acids</i> |               |             |             |             |              |             |             |             |
| Benzoic acid          | 0.12 ± 0.04   | 0.10 ± 0.02 | nd          | nd          | 0.12 ± 0.03  | 0.09 ± 0.09 | nd          | nd          |
| p-coumaric acid       | 0.05 ± 0.00 * | 0.01 ± 0.01 | nd          | nd          | 0.03 ± 0.00* | nd          | nd          | nd          |

Data is means ± SD of three replicates, except GT S4 stage, where data is mean ± SD of two replicates

\*indicates statistically significant differences between means (p<0.05)

Figure 1

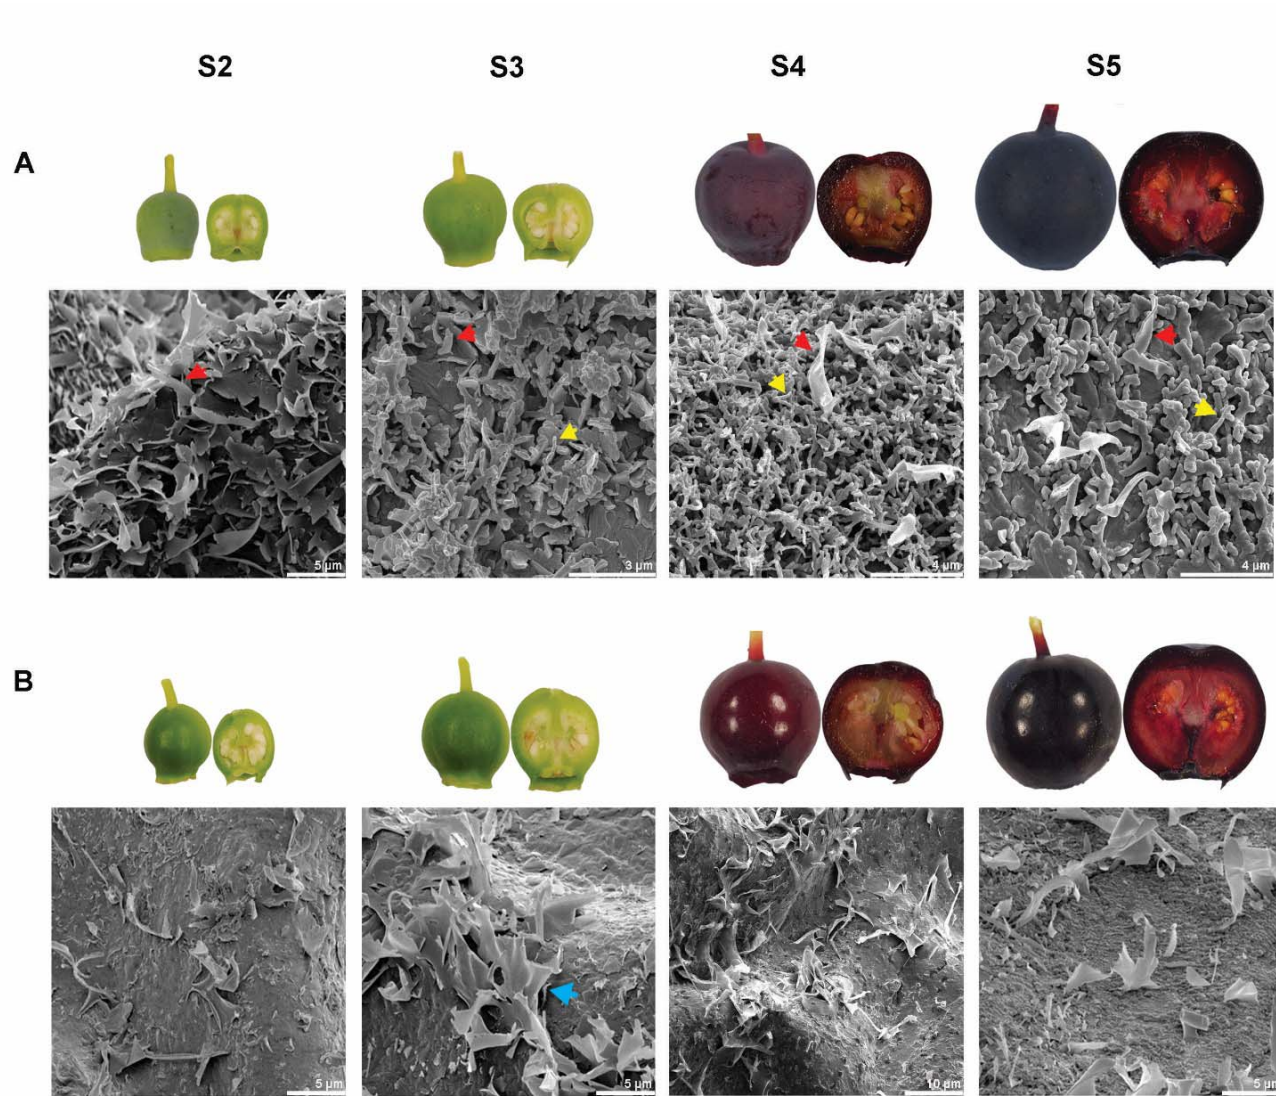

Figure 2

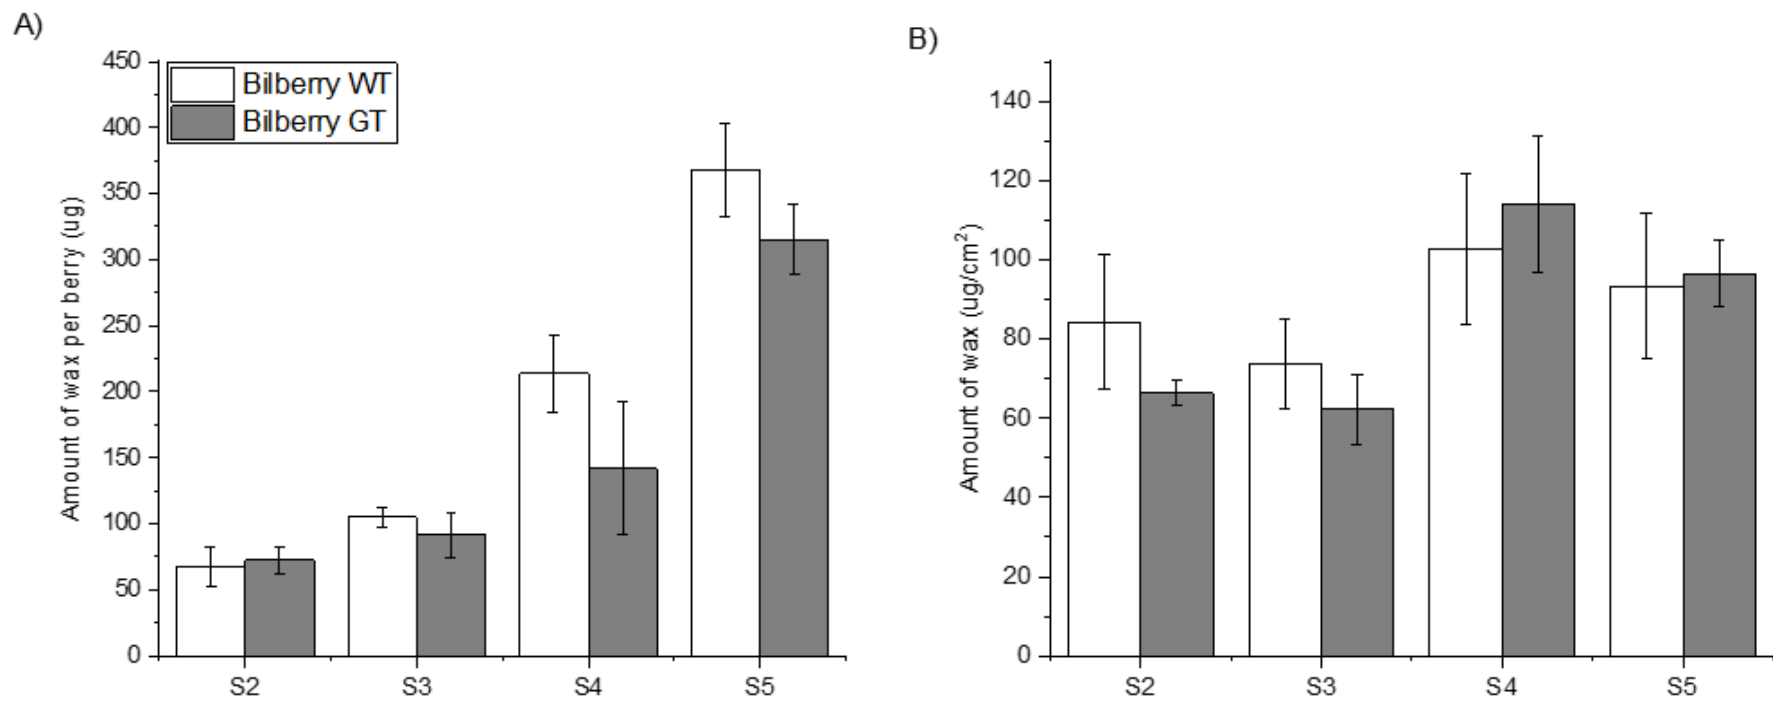

Figure 3

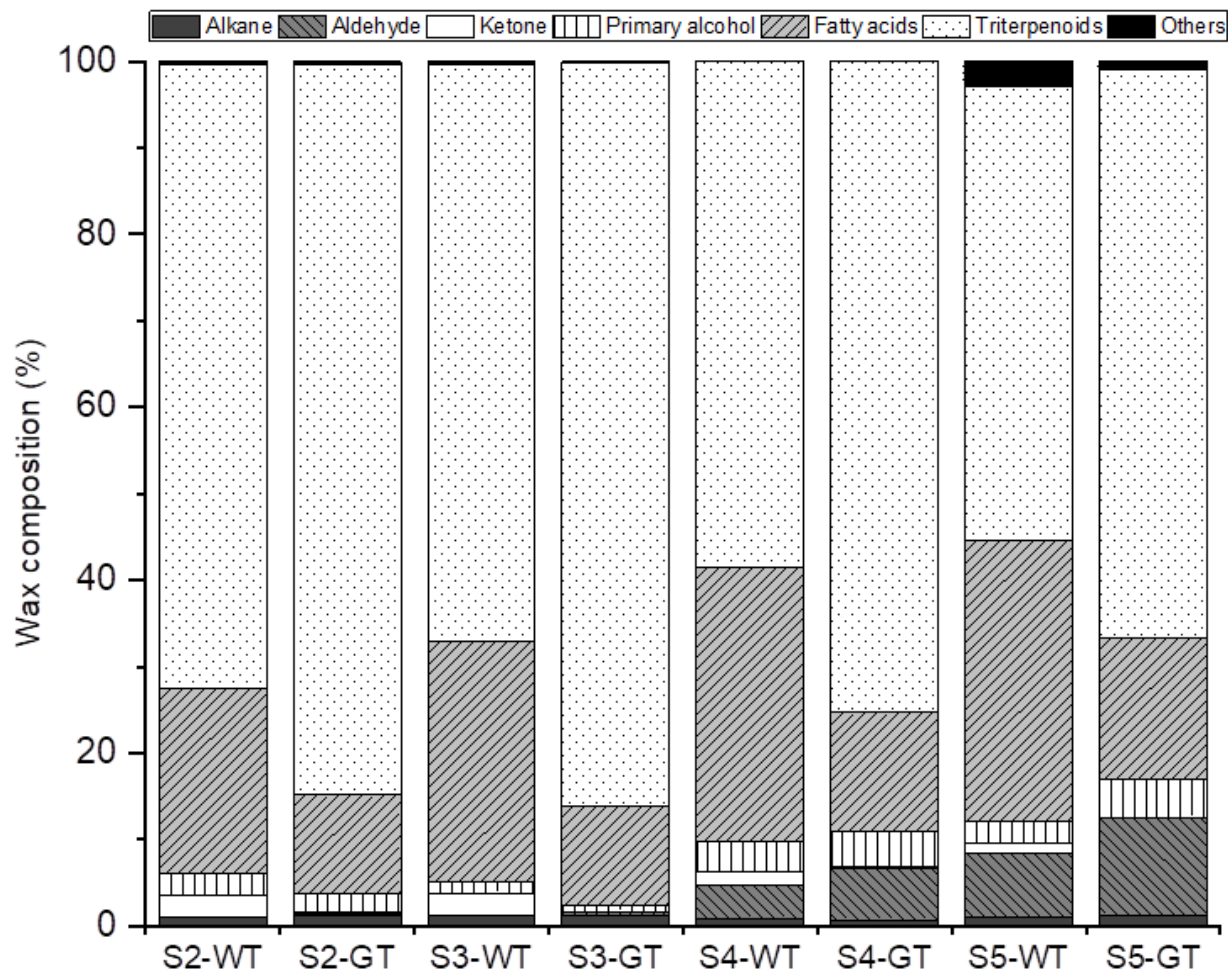

Figure 4

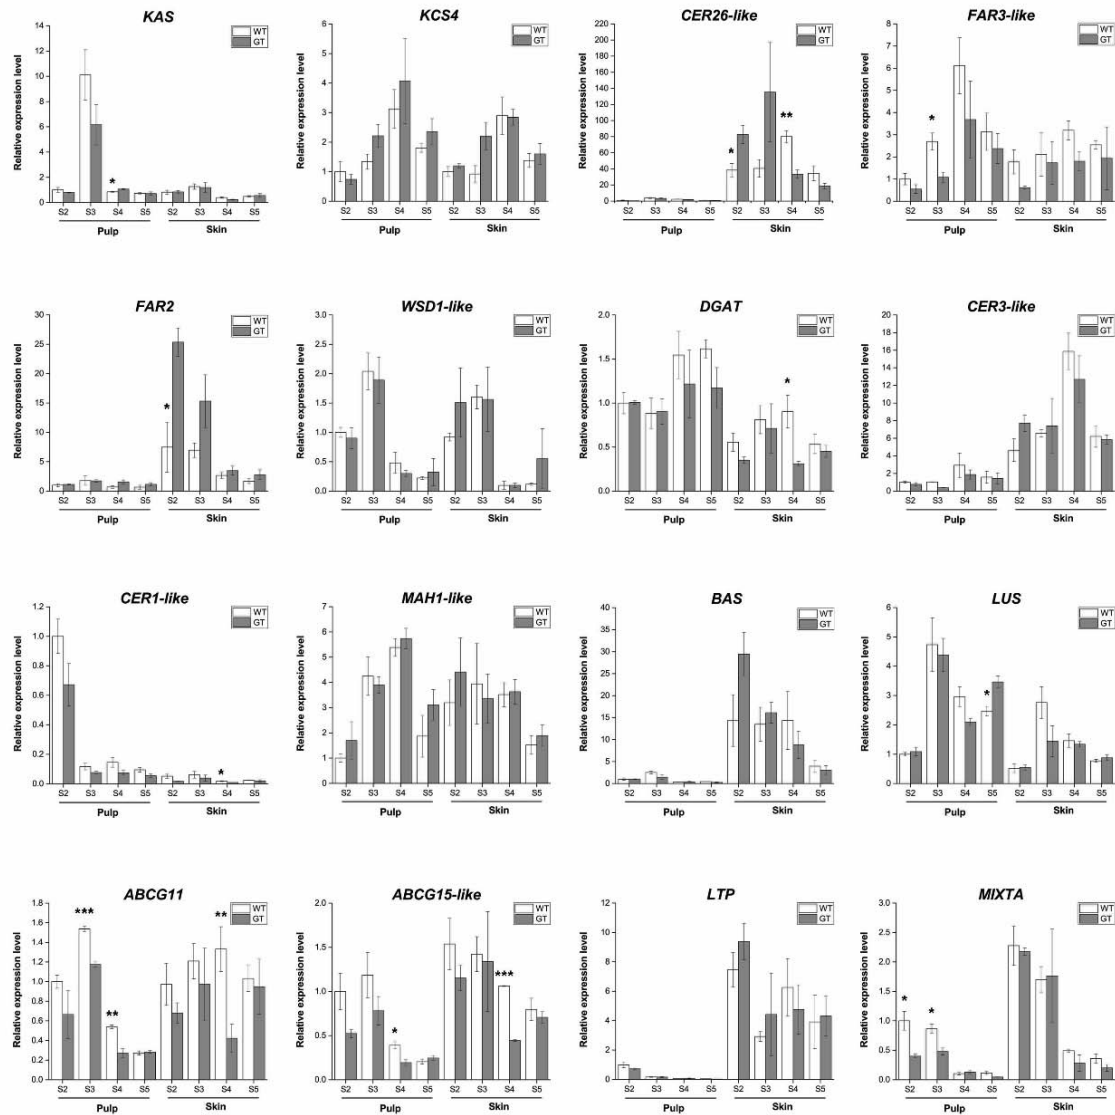

Source: http://biorxiv.org/content/10.1101/2020.04.01.019893v1.full.pdf
